1                   **Dynamics of the sex ratio in *Tetrahymena thermophila***

2           Guangying Wang,<sup>\*,†</sup> Kai Chen,<sup>\*,†</sup> Jing Zhang,<sup>\*,†</sup> Xuefeng Ma,<sup>\*,†</sup> Shanjun Deng,<sup>‡</sup> Jie

3                           Xiong,<sup>\*</sup> Xionglei He,<sup>‡,§</sup> Yunxin Fu,<sup>\*\*,††</sup> and Wei Miao<sup>\*</sup>

4           \*Key Laboratory of Aquatic Biodiversity and Conservation, Institute of Hydrobiology,  
5           Chinese Academy of Sciences, Wuhan, Hubei 430072, China

6           <sup>†</sup>University of Chinese Academy of Sciences, Beijing 100049, China

7           \*\*Laboratory for Conservation and Utilization of Bioresources, Yunnan University,  
8           Kunming 650091, China

9           <sup>††</sup>Department of Biostatistics and Data Science, and Human Genetics Center, School  
10           of Public Health, The University of Texas Health Science Center, Houston, Texas 77030

11           <sup>‡</sup>Key Laboratory of Gene Engineering of Ministry of Education, Cooperative  
12           Innovation Center for High Performance Computing, College of Ecology and Evolution,  
13           Sun Yat-sen University, Guangzhou 510275, China

14           <sup>§</sup>State Key Laboratory of Biocontrol, School of Life Sciences, Sun Yat-sen University,  
15           Guangzhou 510275, China

16

17           Reference numbers for genome sequencing data at SRA: SRP080979

18

19

20

21

22

23 Running title: Sex ratio dynamics in *Tetrahymena*

24

25 *Key words:* ciliate, multi-sex system, sex ratio, population genetics, experimental

26 evolution

27

28 Corresponding author:

29 **Yunxin Fu**

30 1200 Herman Pressler Street RAS E541 Houston, TX 77030, USA

31 Phone: 713-500-9813

32 E-mail: [yunxin.fu@uth.tmc.edu](mailto:yunxin.fu@uth.tmc.edu)

33

34 **Wei Miao**

35 #7 Donghu South Rd., Wuchang District, Wuhan, Hubei 430072, China

36 Phone: 86-27-68780050

37 E-mail: [miaowei@ihb.ac.cn](mailto:miaowei@ihb.ac.cn).

38

39

40

41

42

43

44

## 45 **Abstract**

46 Sex is often hailed as one of the major successes in evolution, and in sexual  
47 organisms the maintenance of proper sex ratio is crucial. As a large unicellular  
48 eukaryotic lineage, ciliates exhibit tremendous variation in mating systems,  
49 especially the number of sexes and the mechanism of sex determination (SD), and  
50 yet how the populations maintain proper sex ratio is poorly understood. Here  
51 *Tetrahymena thermophila*, a ciliate with seven mating types (sexes) and probabilistic  
52 SD mechanism, is analyzed from the standpoint of population genetics. It is found  
53 based on a newly developed population genetics model that there are plenty of  
54 opportunities for both the co-existence of all seven sexes and the fixation of a single  
55 sex, pending on several factors, including the strength of natural selection. To test  
56 the validity of predictions, five experimental populations of *T. thermophila* were  
57 maintained in the laboratory so that the factors that can influence the dynamics of  
58 sex ratio could be controlled and measured. Furthermore, whole-genome  
59 sequencing was employed to examine the impact of newly arisen mutations. Overall,  
60 it is found that the experimental observations highly support theoretical predictions.  
61 It is expected that the newly established theoretical framework is applicable in  
62 principle to other multi-sex organisms to bring more insight into the understanding  
63 of the maintenance of multiple sexes in a natural population.

64

65 *Key words:* ciliate, multi-sex system, sex ratio, experimental evolution

66

## 67 **Introduction**

68 Sex is often hailed as one of the most successful evolutionary inventions across  
69 eukaryotes (Weismann 1887; Bell 1982) and is fundamental for lineage survival  
70 (Speijer *et al.* 2015). This is due to various benefits provided by sex, such as speeding  
71 up adaptation by accelerating the accumulation of beneficial mutations (Fisher 1930;  
72 Muller 1932) and allowing natural selection to proceed more effectively by  
73 increasing the genetic variance in fitness (Weismann 1887; Burt 2000). For most  
74 sexual organisms, a crucial prerequisite for the occurrence of sex is that a population  
75 must maintain appropriate proportion of different sexes, or sex ratio. The strategies  
76 to adjust offspring sex ratio have been well demonstrated in a wide range of  
77 organisms with two sexes, male and female, in the context of Fisher's equal  
78 allocation theory and its extensions (West 2009). However, how organisms with  
79 multiple (>2) sexes maintain proper sex ratio in the population is still poorly  
80 understood.

81 Ciliates are a large unicellular eukaryotic evolutionary lineage that show rapid  
82 diversification in many aspects of the mating systems (Phadke and Zufall 2009). First,  
83 ciliates exhibit a great variation in the number of mating types (sexes), ranging from  
84 two to several or more, e.g. 100 for *Stylonychia mytilus* (Ammermann 1982). Second,  
85 the mechanisms of sex determination (SD) differ widely, ranging from Mendelian  
86 systems to developmental nuclear differentiation, either stochastic or cytoplasmic  
87 (Orias *et al.* 2017). The well-studied ciliate, *Tetrahymena thermophila*, has seven  
88 self-incompatible sexes (I–VII) that are determined by alleles at a single locus (*mat*).  
89 Unlike the sex-specific alleles (*mat-a*, *mat-alpha*) in yeast, each *mat* allele specifies  
90 the probability with which a progeny cell will express one of the seven sexes  
91 (Arslanyolu and Doerder 2000). For example, a classic B-type *mat* allele specifies the

92 following probabilities for each sex: I, 0; II, 0.275; III, 0.192; IV, 0.278; V, 0.076; VI,  
93 0.041; VII, 0.138 (Nanney 1960). This particular form of sex inheritance has been  
94 called probabilistic SD and the unique distribution of probabilities is called the  
95 allele's SD pattern (Paixao *et al.* 2011). For each allele, the SD pattern is very stable  
96 (Phadke *et al.* 2014), but can be affected by environmental conditions such as  
97 temperature and nutrition during sexual reproduction. The probabilistic SD was  
98 previously shown to cause the evolution of uneven sex ratios in natural populations  
99 of *T. thermophila* (Paixao *et al.* 2011).

100 Like most ciliates, *T. thermophila* are facultatively sexual: cells reproduce  
101 asexually by binary fission when food is abundant and conjugation, the non-  
102 reproductive sexual stage, is induced between cells of different sexes under  
103 starvation conditions (Orias *et al.* 2011) (Figure S1 in File S1). Each *T. thermophila* cell  
104 contains a diploid germinal micronucleus (MIC) and a polyploid somatic  
105 macronucleus (MAC). During conjugation, the MIC undergoes meiosis to form  
106 gamete nuclei that fuse to produce new zygotic MIC via reciprocal fertilization. The  
107 new MAC differentiates from mitotic copy of the new MIC and goes through  
108 developmental genome editing and polyploidization, and the old MAC is destroyed  
109 by programmed nuclear death. A recent study revealed that the B-type *mat* allele in  
110 the MIC contained six pairs of incomplete genes, specifying sex II-VII, respectively  
111 (Cervantes *et al.* 2013). During MAC development, all but one gene pair is deleted  
112 and the remaining pair are re-assembled at the MAC *mat* locus by joining to intact  
113 transmembrane (TM) exons that are shared across all sex gene pairs. After  
114 conjugation, progeny will go through a period of sexual immaturity, typically lasting  
115 for 40–80 asexual generations (Perlman 1973), during which time cells are unable to

116 mate. Knowledge about the patterns of probabilistic SD and molecular  
117 characterization of the *mat* allele makes *T. thermophila* a good multi-sex system in  
118 which to analyze the dynamics of sex ratio, from the perspective of population  
119 genetics.

120 Here, we first develop a population genetics model to dissect the mating  
121 kinetics in a large population of *T. thermophila* and to make quantitative predictions  
122 about how population sex ratio will evolve. We then investigate the impact of  
123 different parameters in the model on the dynamics of sex ratios. To test if  
124 population sex ratios follow the trajectories predicted by the model, we establish  
125 five replicate experimental populations and allow them to mate every 100 asexual  
126 generations, during which sex ratio dynamics and the frequencies of newly arisen  
127 mutations are tracked by time-course whole-genome sequencing. Overall,  
128 experimental observations highly support theoretical predictions. The newly  
129 established theoretical framework is applicable in principle to other multi-sex  
130 organisms and will provide more insight into the understanding of the maintenance  
131 of multiple sexes in natural populations.

132

133

134

135

136

137 **Materials and Methods**

## 138 The theory

139 Consider a large population of *T. thermophila*, in which sexual reproduction occurs  
140 periodically (for example, every 100 cell divisions) and in-between the population  
141 grows asexually.

142 Sexual reproduction starts with cell pairing (conjugation) which is assumed to  
143 be a random but synchronized process such that incompatible pairs (cells of the  
144 same sex) will dissolve and retry until no further pairing is possible. The process can  
145 be specified in detail as follows. Let  $p_i$  be the frequency of sex  $i$  right before the  
146 sexual reproduction and  $q_i(t)$  be the relative frequency of sex  $i$  right after the  $t$ -th  
147 round of pairing, then  $q_i(0) = p_i$ . Since pairing is at random, at the  $t$ -th round of  
148 pairing the probability of a cell of sex  $i$  not paired is  $q_i^2(t-1)$ , and after the  
149 frequency is re-calibrated, the frequency of sex  $i$  among the unpaired cells is

$$150 \quad q_i(t) = \frac{q_i^2(t-1)}{\alpha_t} \quad (1)$$

151 where  $\alpha_t = \sum_i q_i^2(t-1)$ , which is the expected relative proportion of unpaired  
152 cells after the  $t$ -th round of pairing. The overall proportion of unpaired cells will  
153 converge to

$$154 \quad \alpha = \prod_{t=1} \alpha_t \quad (2)$$

155 which is necessarily all cells of the most frequent sex type ( $k$ ) before the sexual  
156 reproduction starts. Table 1 presents a summary of this and other parameters used  
157 in the description of the sexual reproduction process. After recalibration, the  
158 percentage of sex  $i$  among the cells involved in the pairing is

$$159 \quad (p_i - \delta_{i-k}\alpha)/(1 - \alpha) \quad (3)$$

160 where  $\delta_m$  takes value 1 if  $m = 0$ , and 0 otherwise.

161 In general not all paired cells proceed to the next step, some will dissolve and  
 162 do not participate in the subsequent steps of the sexual reproduction together with  
 163 the  $\alpha$  proportion that are not paired. Let  $\beta$  represent the probability that each pair  
 164 dissolves and furthermore it is assumed that each intact pair has probability  $\gamma$  to  
 165 produce offspring (and has probability  $1 - \gamma$  to die without producing offspring). For  
 166 each successfully reproducing pair, its two offspring have sex frequencies specified  
 167 by the SD pattern  $f = (f_1, \dots, f_7)$ . After the sexual reproduction, the total number of  
 168 cells in the population is  $Nr$  where

$$169 \quad r = \alpha + \beta(1 - \alpha) + (1 - \beta)(1 - \alpha)\gamma \quad (4)$$

170 which is the probability that a cell either survives without participating in sexual  
 171 reproduction or passes its genetics to offspring in sexual reproduction. Among the  
 172  $Nr$  cells, the proportion that is not sexual offspring is

$$173 \quad [\alpha + \beta(1 - \alpha)]/r \quad (5)$$

174 and there are

$$175 \quad N\delta_{i-k}\alpha + N\beta(1 - \alpha)(p_i - \delta_{i-k}\alpha)/(1 - \alpha) + N(1 - \beta)(1 - \alpha)\gamma f_i \quad (6)$$

176 cells that are of sex  $i$ . Let  $p'_i$  be the frequency of sex  $i$  after the sexual reproduction.

177 It follows that

$$178 \quad p'_i = \frac{\delta_{i-k}\alpha + \beta(p_i - \delta_{i-k}\alpha) + (1 - \beta)(1 - \alpha)\gamma f_i}{r}$$

$$179 \quad = \frac{\beta p_i + (1 - \beta)[\delta_{i-k}\alpha + (1 - \alpha)\gamma f_i]}{r} \quad (7)$$

180 Since it is assumed that  $N$  is sufficiently large so that random genetic drift is  
 181 negligible,  $p'_i$  will be the frequency of sex  $i$  right before the next round of sexual  
 182 reproduction if there is no natural selection.



183 By setting  $p'_i - p_i = 0$ , one can solve the equation for the equilibrium  
184 frequencies which lead to

$$185 \quad p_i = \frac{\delta_{i-k}\alpha_\infty + (1-\alpha_\infty)\gamma f_i}{\alpha_\infty + (1-\alpha_\infty)\gamma} \quad (8)$$

186 where  $\alpha_\infty$  is the limiting  $\alpha$  value. It may appear that the equilibrium frequencies  
187 have nothing to do with  $\beta$ , but it is not true since its impact is reflected through the  
188 limiting  $\alpha$  value.

189 Next we consider the impact of selectively advantageous mutations. Suppose a  
190 mutation emerges right after sex on a macronucleus of sex  $i$  with frequency  $m'_f$  and  
191 growth rate  $1 + s$  per cell division. Then right before the next sexual reproduction,  
192 the proportions of cells of various sexes ( $j = 1, \dots, 7$ ) are

$$193 \quad p_j = \frac{p'_j + \delta_{i-j}m'_f[(1+s)^n - 1]}{(1-m'_f) + m'_f(1+s)^n} \quad (9)$$

194 The frequency of cells containing the mutant right before sexual reproduction is

$$195 \quad m_f = \frac{m'_f(1+s)^n}{(1-m'_f) + m'_f(1+s)^n} \quad (10)$$

196 Immediately after the next sexual reproduction, mutant allele frequency becomes

$$197 \quad m'_f = \frac{\delta_{i-k}\alpha m_f / p_k + \beta(m_f - \delta_{i-k}\alpha m_f / p_k)}{r}$$

$$198 \quad = \frac{\delta_{i-k}(1-\beta)\alpha / p_k + \beta}{r} m_f \quad (11)$$

199 where  $\delta_{i-k}$  is 1 if the mutant (sex  $i$ ) is the most frequent sex and 0 otherwise.

200 By substituting the  $m_f$  in Equation (11) by (10), it leads to

$$201 \quad m''_f = \frac{\delta_{i-k}(1-\beta)\alpha / p_k + \beta}{r} \frac{(1+s)^n}{(1-m'_f) + m'_f(1+s)^n} m'_f$$

202 which leads to the equilibrium solution for  $s > 0$

$$203 \quad m'_f = \left\{ \frac{\delta_{i-k}(1-\beta)\alpha / p_k + \beta}{r} (1+s)^n - 1 \right\} / ((1+s)^n - 1) \quad (12)$$

204 Apparently if  $\alpha = 1$ , it will lead to the fixation of the mutant allele. Otherwise an  
205 internal equilibrium is possible.

206 If an advantageous mutation (in terms of growth) occurs in a micronuclear, and  
207 since the micronuclear is not expressed during growth, its advantage is hidden until  
208 it is passed to the macronuclear during sexual reproduction. The difference here is  
209 that the advantage is inheritable. Due to redistribution of sex, the mutant will spread  
210 over all sexes and eventually will be fixed without the necessity of fixing a sex.

211

## 212 **The experiment**

213 **Design of the experiment:** To develop a better understanding on how various factors  
214 may affect the fate of a population, and to test if sex ratio dynamics follows our  
215 theoretical predictions, five replicate experimental populations (CS1-CS5) were  
216 established, each started with induced mating between equal proportion of  
217 homogeneous ancestor cells of sex IV and VI. The resulting population grew  
218 asexually for 100 generations with stable but large population size achieved by daily  
219 serial transfer and then it went into the next round of sexual reproduction. This  
220 sex:asex cycle was repeated 10 times for each of the replicate experiments.  
221 Immediately before each starvation to induce sexual reproduction, a large sample of  
222 cells was extracted, of which a portion was stored in liquid nitrogen (Cassidy-Hanley  
223 2012) and the remaining was used for whole-genome sequencing for mutation  
224 identification as well as the determination of sex ratio. Due to the high cost of the  
225 whole-genome sequencing, we only sequenced DNA samples from CS1-CS3 across all  
226 time points and CS4 from generation 400 to 1,000. Although samples from CS5 were  
227 not sequenced, it still provided useful information on what sex was eventually fixed

228 in the population. The essentials of the experiment are described below and more  
229 laboratory details can be found in the supplementary material (File S2).

230

231 **Ancestral population:** Strain SB210 mated with the star strain B\*VII through  
232 genomic exclusion (GE) crosses (Allen 1967). The progeny of the GE crosses are  
233 whole-genome homozygotes in both nuclear genomes, but different progeny cells  
234 can exhibit different sexes in the MAC due to the probabilistic SD. When the progeny  
235 population matured, two cells, one of sex IV and another of sex VI (named Anc\_IV  
236 and Anc\_VI, respectively), were selected as ancestral cells and their asexual clonal  
237 populations became the starting cells for each of the replicate experimental  
238 populations. All these cells inherited the same B-type *mat* allele from SB210.

239

240 **The parameters in the experimental populations:** To estimate the parameters  $\beta$  and  
241  $\gamma$ , only the proportional survival cells ( $a$ ) and within which the proportion of asexual  
242 offspring ( $b$ ) are required (when  $\alpha$  is known). For example when  $\alpha = 0$ , it follows  
243 from (4) and (5) that  $\beta = a \times b$  and  $\gamma = \beta \times (1 - b) / [b \times (1 - \beta)]$ . The sex ratio  
244 pattern of the evolving population at the end of the first sex:asex cycle (i.e. at  
245 generation 100) was used to estimate  $f$ . As unmated Anc\_IV and Anc\_VI cells  
246 underwent serial passage along with progeny produced by sexual reproduction,  
247 correction for the background sex ratio of unmated cells was necessary to obtain the  
248 true  $f$  value representing the sex ratio pattern of sexual progeny. In addition,  
249 because natural selection during serial passage will also affect the estimation of  $f$ ,  
250 we therefore recorded the daily growth rate as  $\ln \left( \frac{\text{cell density}_{24\text{hr}}}{\text{cell density}_{0\text{hr}}} \right) / 24$  (Kishimoto *et*  
251 *al.* 2010) of the two ancestral populations in a week before mating and the resulting

252 population during the following 100 asexual generations. For each evolving  
253 population, we tracked the changes in fitness by measuring the growth rate and  
254 determined parameter  $s$  as the ratio (minus 1) of the eventual population fitness and  
255 the starting ancestral population fitness that was calculated as the mean growth rate  
256 of the two ancestral populations over the week of serial passage. The relative fitness  
257 trajectory of each evolving population was analyzed by the SSlogis model in R 3.4.1  
258 (<http://www.r-project.org/>).

259

260 **Determination of sex ratio and identification of sexual progeny:** The sex ratios in  
261 each sample were determined by mapping sequencing reads to the MIC reference  
262 genome (Hamilton *et al.* 2016). After removing the internally eliminated sequences  
263 (IESs) background within the *mat* locus, the sequencing depth of gene segments  
264 specific to each sex was used to determine the proportion of each sex. Two different  
265 approaches were used to determine whether unmated ancestral cells were  
266 responsible for the fixed sex. First, we performed sex testing experiments for all  
267 evolving populations at generation 600. Each evolving population was mixed  
268 separately with cultures of six test strains that are of sex II–VII, respectively  
269 (Hamilton and Orias 2000) to determine its fixed sex. Second, we used SNPs in the  
270 TM and truncated transmembrane (tm) exons of the MIC *mat* locus as molecular  
271 makers to distinguish sexual progeny from unmated ancestral cells because sexual  
272 progeny can acquire novel combinations of SNPs into MAC TM exons during mating  
273 (see details in File S2).

274

275 **Whole genome sequencing, SNP calling and annotation:** To track sex ratio dynamics  
276 and analyze the SNP in MAC TM exons to distinguish between sexual progeny and  
277 unmated ancestral cells, DNA samples were taken from populations CS1, CS2 and  
278 CS3 every 100 asexual generations until generation 1000. For SNP analysis in MAC  
279 TM exons in the population CS4, DNA samples were taken every 100 asexual  
280 generations from generation 400 to 1000. To prevent possible changes to the  
281 genetic structure of populations resulting from long-term storage, all DNA samples  
282 were isolated as soon as taken from each evolving population. However, due to the  
283 poor quality of the DNA sample from the CS2 population at generation 200, cell  
284 stock in liquid nitrogen was thawed and used for DNA isolation. Sequencing libraries  
285 were constructed using a standard Illumina protocol as previously described (Xiong  
286 *et al.* 2015). All libraries were sequenced to depths of about 30-fold coverage except  
287 libraries of the two ancestral samples that were sequenced to ~250-fold coverage,  
288 using Illumina HiSeq 2000 or HiSeq 2500 instruments. A detailed SNP calling pipeline  
289 is given in File S2. Briefly, sequenced reads after trimming off adapters were aligned  
290 to *T. thermophila* MAC reference genome (Stover *et al.* 2006). Then we marked PCR  
291 duplicate reads, performed local realignment around potential indels and  
292 recalibrated the base quality score. We next ran VarScan 2.3.9 (Koboldt *et al.* 2009;  
293 Koboldt *et al.* 2012) for SNP calling. To reduce the risk of false positives, each  
294 mutation had to be supported by at least three forward and three reverse reads as  
295 previously reported (Sung *et al.* 2012; Long *et al.* 2016). By taking advantage of our  
296 time-course sequencing, we further refined candidate mutations based on mutation  
297 frequency trajectories, as previously reported (Lang *et al.* 2013; McDonald *et al.*  
298 2016). In particular, the imprecise IES excision in the newly developing MAC during

299 mating can result in the formation of many SNPs or indels around the IES junction  
300 sites (Hamilton *et al.* 2016). Therefore, candidate mutations were required to be  
301 located at least 60bp from the IES excision endpoint. Functional annotation of each  
302 mutation was carried out using SnpEff (Cingolani *et al.* 2012).

303

304 **Identification and functional validation of beneficial mutations:** We used two  
305 criteria to identify putative beneficial mutations. First, beneficial mutations are more  
306 likely than neutral or deleterious mutations to spread within a population. Thus, we  
307 considered mutations that reached a frequency of at least 0.9 as candidate beneficial  
308 mutations. Second, the frequency of beneficial mutations should correlate with  
309 changes in fitness. We therefore determined the Pearson correlation coefficients  
310 between changes in fitness and the frequency of each identified mutation. Putative  
311 beneficial mutations were required to have a correlation coefficient of  $\geq +0.8$  (Table  
312 S2). Mutations that met both criteria were classified as beneficial. To validate  
313 whether a selected mutation confers a fitness benefit, we introduced it into both  
314 ancestral cells, see supplementary material in File S2. Then we mixed each mutant  
315 cell population with its corresponding ancestral cell population in roughly equal  
316 proportion and propagated them under the same conditions as the evolution  
317 experiment. Sanger sequencing was performed every two days to determine the  
318 relative proportion of each cell type. PCR primers used to amplify sequences contain  
319 mutation site were: Mut-f4001 5'-TAGATTAAGACACTTTAGAAAAAGC-3' and Mut-  
320 r4898 5'-TCATTGATTCATTAGATTATCTTTC-3'. Competition assays were carried out in  
321 duplicate.

322

## 323 **Data availability**

324 The mathematic model was analyzed using Java 9 and the source code will be  
325 available upon request. File S1 contains additional figures including the life cycle of *T.*  
326 *thermophila* (Figure S1), impact of the model parameters on sex ratio patterns when  
327 using another  $f$  (Figure S2), and growth rate records of the two ancestral  
328 populations and the three sequenced evolving population during the first 100  
329 asexual generations (Figure S3). Table S1 in File S1 shows the sex ratios in the three  
330 sequenced evolving populations at generation 100. File S2 contains additional  
331 Materials and Method sections. Table S2 contains frequency trajectories and  
332 functional annotation of all identified mutations. Supplementary material has been  
333 uploaded to figshare. All genome sequencing data are available at Sequence Read  
334 Archive with accession number SRP080979.

335

## 336 **Numerical Results**

### 337 **Impact of the model parameters on the equilibrium frequencies of sexes**

338 As shown in the Theory section, parameters influencing the equilibrium sex ratios  
339 include the initial population sex ratio before mating,  $\beta$ ,  $\gamma$ ,  $f$  and  $s$ . We thus  
340 explored numerically the impact of these parameters.

341 Define  $f_{max}$  as the largest  $f_i$  and  $sf_{max}$  as the corresponding sex. To simplify the  
342 illustration, we first set  $f$  to be the estimated SD pattern (II, 0.306; III, 0.010; IV,  
343 0.267; V, 0.047; VI, 0.113; VII, 0.257) from our experiments. Then,  $f_{max} = 0.306$  and  
344  $sf_{max} = \text{II}$ . We started by considering the scenario in which the population starts  
345 with two randomly selected sexes of equal proportions (Figure 1, A-D). Figure 1A  
346 shows that the population sex ratios at equilibrium exhibit two patterns under

347 different combinations of  $\beta$  and  $\gamma$ : all six sexes co-exist or a single sex is fixed.  
348 Specifically, larger  $\gamma$  facilitates the co-existence, and the probabilities of fixing  
349 different sexes are positively correlated with the sex frequency distribution in  $f$ . In  
350 addition, Figure 1, B-D indicates larger  $\beta$  can increase the probability of fixing other  
351 sexes except the  $sf_{max}$ . We then allowed in the initial population random sex ratio  
352 of the given set of sexes (but their frequencies sum necessarily to 1). Figure 1E shows  
353 that random sex ratio remarkably decreases the fixation probability of  $f_{max}$   
354 compared to that shown in Figure 1A. However, increasing the number of sexes in  
355 the initial population promotes the fixation of  $f_{max}$  (Figure 1F). These comparisons  
356 show that higher sex diversity, including more even sex ratio and greater number of  
357 sexes, facilitates the fixation of  $f_{max}$ . In the extreme case, when a population starts  
358 with equal proportions of all the six sexes, only the  $sf_{max}$  (sex II) can be fixed (Figure  
359 1G). Similar results were also found when  $f$  is set to other SD patterns, such as the  
360 one described in the Introduction section (Figure S2 in File S1).

361 Next, we evaluated the impact of  $f_{max}$  values on the patterns of equilibrium sex  
362 ratios. For a B-type *mat* allele, the  $f_{max}$  value can range from 1/6 to 1. Figure 1H  
363 shows the probability of co-existence of all sexes decreases with the increase of  $f_{max}$ .  
364 In particular, when  $f_{max}$  is greater than 0.5, co-existence will not occur. A simple  
365 explanation is that when more than half of the progeny produced by any two of the  
366 six sexes in a random-mating population express the sex of  $f_{max}$ , the frequency of  
367  $f_{max}$  will gradually increase up to fixation.

368 We further investigated how mutation that occurs on the MAC right after sexual  
369 reproduction affects the evolutionary consequence of sex ratios. For simplicity, we  
370 only considered the two cases in which either the  $sf_{max}$  (sex II, Figure 2A) or the



371 least frequent one (sex III, Figure 2B) obtains a beneficial mutation, and assumed  
372 that the population starts with equal proportions of any two of the six sexes.  
373 Compared to Figure 1A, Figure 2 shows that the patterns of equilibrium sex ratio  
374 changes strikingly. Sex obtaining a beneficial mutation has an increased probability  
375 to be fixed and larger  $\beta$  or  $s$  values will intensify this tendency. When  $s$  is larger than  
376 a certain threshold, sex with the beneficial mutation will be destined for fixation  
377 regardless of the values of  $\beta$  and  $\gamma$ .

378

### 379 **Impact of environmental fluctuations on the equilibrium frequencies of the sexes**

380 In the numerical exploration described above,  $f$  is fixed which is relatively  
381 stable for a given experimental setting. However, in reality change in some  
382 environmental factors may lead to the modification in the values of  $f$  and other  
383 parameters. In natural populations of *T. thermophila*, a series of environmental  
384 fluctuations including the changes of abiotic and biotic factors are possible to  
385 influence the equilibrium sex ratio pattern that has already established in the ideal  
386 mating population. For example, migration among populations leads to the  
387 immediate changes of population sex ratio, temperature and food availability affect  
388 the parameter  $f$  (Nanney 1960; Orias and Baum 1984) and a salty environment can  
389 changes the values of  $\beta$  and  $\gamma$ .

390 For simplicity of illustration, consider a population in which cells will not  
391 dissolve once successfully paired together ( $\beta = 0$ ) and all pairs will produce progeny  
392 ( $\gamma = 1$ ), its sex ratio at equilibrium can be readily predicted when the parameter  $f$  is  
393 determined. For example, a population with the empirically estimated  $f$  will reach  
394 the following equilibrium sex ratio: II, 0.316; III, 0.010; IV, 0.263; V, 0.046; VI, 0.112;

395 VII, 0.253. By imposing a varying degree of deviations or fluctuations on either the  
396 established equilibrium sex ratio (Figure 3A) or the parameter  $f$  when determining  
397 the progeny sex distribution after each round of mating (Figure 3B), we found sex  
398 ratio patterns are both changed dramatically and the impact of fluctuation on  
399 parameter  $f$  seems more remarkable. A slight fluctuation will lead first to the  
400 fixation of the  $f_{max}$ , and with the increase of fluctuation degrees, other sexes can  
401 also be fixed with probabilities positively correlated with the sex frequency  
402 distribution in  $f$ .

403

## 404 **Experimental results**

### 405 **Parameter estimation and prediction of sex ratio dynamics**

406 After mating between the two ancestral populations of equal proportion ( $\alpha = 0$ ), we  
407 found in the five replicate experimental populations, the number of cells decreased  
408 to an average of 52% within which 38% were the two unmated ancestral cells and  
409 each of them should account for 19%. According to equation (4) and (5), parameter  
410  $\beta$  is equal to 20%, and  $\gamma$  is equal to 40%. As there was no significant difference in  
411 growth rate among the two ancestral populations and the resulting population after  
412 mating (Figure S3 in File S1), it is reasonable to assume that the proportion of each  
413 unmated ancestral cell (19%) did not change significantly and the effect of natural  
414 selection could be neglected during serial passage for the first 100 generations. Thus,  
415 after correction by subtracting background sex ratio of unmated ancestral cells from  
416 the average sex ratio (Table S1 in File S1) in the three sequenced evolving  
417 populations (CS1-CS3) at generation 100, the  $f$  values were: II, 0.306; III, 0.010; IV,  
418 0.267; V, 0.047; VI, 0.113; VII, 0.257.

419 Using these estimated parameter values, we could readily predict the sex ratio  
420 dynamics in a large experimental population. When a population begins with the two  
421 ancestral populations in equal proportions and mates every 100 asexual generations,  
422 and there is no selection, we found sex II would increase in frequency gradually and  
423 eventually be fixed (Figure 4B).

424

#### 425 **Natural selection is responsible for the fixation of single sex**

426 Sex ratio dynamics showed that at generation 100, all three sequenced populations  
427 (CS1-CS3) contained a mixture of cells with sex II–VII. Over time, however, a different  
428 single sex became dominant gradually and then fixed within each population (Figure  
429 5A). In addition, during each round of mating, we calculated the ratios of mating  
430 pairs and sexual progeny (File S2). After several sex:asex cycles, no mating pairs or  
431 sexual progeny were observed in any of the replicate populations (Table 2). Sex  
432 testing at generation 600 showed that each population expressed only a single sex,  
433 but there were four different sexes fixed in the five replicate populations. These  
434 results deviated strikingly from the prediction that only sex II could be fixed if all  
435 parameters were the same and there is no selection. Considering the large  
436 population size in our experiment, the observed deviations are unlikely to be caused  
437 by genetic drift. A more plausible explanation is that a subgroup of cells expressing a  
438 specific sex gain an increased growth fitness and expanded to fixation consequently.  
439 Indeed, the overall growth record revealed that the relative fitness of each evolving  
440 population increased markedly (Figure 5B).

441 In three of the replicate populations (CS1, CS2, and CS4), the fixed sexes were  
442 the same as one of the ancestral cells, sex IV or VI. However, according to SNP

443 analysis in the MAC TM exons, we identified several SNPs that were either lost or  
444 became fixed in each of the three populations (Figure 5C). In addition, the other two  
445 populations, CS3 and CS5, fixed different sexes (II and VII, respectively) than the  
446 ancestral cells. Thus, unmated ancestral cells had been completely replaced in all the  
447 five replicate populations, suggesting that sexual progeny cells might gain a faster  
448 growth rate than ancestral cells.

449

#### 450 **Identification of beneficial mutations**

451 The analysis described in the previous section establishes that increased fitness of  
452 sexual progeny was responsible for the fixation of a certain sex in each of the  
453 replicate populations. To reveal the molecular basis underlying the increased fitness,  
454 we turn to whole-genome sequencing data. We detected an average of 14.7 *de novo*  
455 mutations per population and several candidate beneficial mutations were identified  
456 in the three sequenced populations: two in CS1, one in CS2, and one in CS3. We then  
457 investigated whether a selected candidate beneficial mutation from the CS1  
458 population confers a fitness benefit (Figure 6A; red line). This point mutation  
459 resulted in a premature termination codon in a gene encoding a serine/threonine  
460 kinase (Table S2). Within 12 days, ancestral cells had been completely replaced by  
461 mutant cells (Figure 6B), providing clear evidence that the selected mutation  
462 conferred increased growth fitness.

463         Given that genes determining sexes are not expressed during growth, it seems  
464 unlikely that they can confer a selective advantage leading to their own rapid fixation.  
465 However, in the case of the CS1 population, purification of sex IV preceded the  
466 fixation of all candidate beneficial mutations. This apparent paradox might be

467 explained in the following way: directly after a single sex becomes purified, the  
468 population might still contain two different cell types of the same sex, with only one  
469 of these containing a beneficial mutation. In the CS1 population, sex IV had become  
470 purified by about generation 500 (Figure 6A; green line). However, the novel SNP at  
471 MAC *mat* locus, a marker for the eventually fixed sex IV genes, did not become fixed  
472 until about generation 600 (Figure 6A; purple line). This suggested that not all MAC  
473 *mat* loci exhibiting sex IV contained this novel SNP at generation 500, and that over  
474 the following 100 asexual generations (from generation 500 to 600), those sex IV  
475 cells containing the novel SNP swept rapidly to fixation by outcompeting sex IV cells  
476 lacking the novel SNP, a phenomenon known as “clonal interference”. Notably,  
477 frequency changes in the novel SNP and the verified beneficial mutation correlated  
478 strongly ( $r = 0.99$ ). This result suggested that sex IV cells containing the novel SNP  
479 also acquired this verified beneficial mutation, and sex IV genes within the cells  
480 became fixed through genetic hitchhiking with the beneficial mutation.

481 Moreover, the effect of selection due to newly arisen beneficial mutations was  
482 likely to be the cause that trajectories of sex ratio in experimental populations  
483 deviated strikingly from theoretical prediction that assumed no selection. According  
484 to the fitness trajectories, the values of  $s$  in three sequenced populations are: 0.12 in  
485 CS1, 0.10 in CS2, 0.14 in CS3. For each population, we then assumed a mutated cell  
486 expressing the fixed sex acquired the corresponding selective advantage in the MAC  
487 right after one of the first five rounds of mating, respectively. In fact, we did not  
488 detect the verified beneficial mutation of the CS1 population in the MIC sequencing  
489 data (data not shown). The results showed the predicted frequency trajectory of the  
490 fixed sex could highly agree with the observation for each population under a

491 specific assumption (Figure 6C). The relative low agreement in the CS2 population  
492 might have resulted from a DNA sample at generation 200 being isolated from the  
493 thawed cultures stored in liquid nitrogen, and the long-term storage might change  
494 the composition of population sex ratio. Overall, when considering the effect of  
495 selection, the results showed that the experimental observations highly supported  
496 our model's predictions and newly arisen beneficial mutations were the cause of the  
497 fixation of single sexes in the populations. In addition, the agreement between  
498 experimental observations and model predictions in the three sequenced  
499 populations (CS1-CS3) suggested that the fixation of a single sex in the populations  
500 CS4 and CS5 was also probably due to newly arisen beneficial mutations because  
501 both of these two populations showed a remarkably increased growth fitness (Figure  
502 5B) and fixed a different sex (IV and VII, respectively) than sex II that is predicted to  
503 be the only fixed sex when there is no selection (Figure 4).

504

## 505 **Discussion**

506 In organisms with two sexes, male and female, the strategy to adjust population sex  
507 ratio has been well demonstrated. Nonetheless, how organisms with multiple sexes  
508 maintain proper sex ratio in the population remains poorly understood. Based on a  
509 newly developed population genetics model, we analyzed in this study the dynamics  
510 of population sex ratio in *T. thermophila*, a ciliate with seven sexes and probabilistic  
511 SD mechanism. We found there are plenty opportunities for both the co-existence of  
512 all sexes and the fixation of a single sex, depending on the combinations of several  
513 parameters, including the strength of natural selection. Specifically, parameter  $\gamma$   
514 mainly determines which pattern the population will exhibit, and the probability that

515 a specific sex is fixed is positively correlated with its frequency in parameter  $f$ , but it  
516 is also affected by  $\beta$  (Figure 1, B-D). Natural selection can strongly shift the sex ratio  
517 pattern toward the fixation of a single sex with a growth advantage. Moreover, in  
518 natural populations of *T. thermophila*, all of these parameters likely fluctuate along  
519 with changing environmental conditions, which can further diversify the population  
520 sex ratio patterns (Figure 3). Experimental observations of sex ratio dynamics  
521 confirmed the validity of the model's predictions.

522 In natural habitats of *T. thermophila*, all seven sexes were generally present  
523 (Doerder *et al.* 1995). However, sex ratios varied remarkably in different sampled  
524 ponds and even displayed local and seasonal variation in the same pond. It was  
525 postulated that sex ratio variations between and within ponds are due to the  
526 fluctuations of SD pattern through the interaction between multiple *mat* alleles and  
527 environmental conditions (Arslanyolu and Doerder 2000). This hypothesis is  
528 consistent with our model prediction that there is sufficient opportunities for the co-  
529 existence of all seven sexes and environmental fluctuations can further increase the  
530 diversity of sex ratios. Moreover, it suggests that population sex ratios at equilibrium  
531 are determined by not only the SD pattern  $f$  but also other parameters involved in  
532 sexual reproduction (equation 9). Thus, our theoretical model provides a  
533 comprehensive framework to illustrate how natural populations of *T. thermophila*  
534 maintain proper sex ratios when responding to changeable environments.

535 Our numerical exploration also suggests that there is a large probability of  
536 fixation of a single sex in a local population. Indeed, due to limited rates of dispersal  
537 in *T. thermophila* (Zufall *et al.* 2013), local populations or subpopulations sampled  
538 from the same pond often contained only a single sex even though all sexes are

539 present in the pond (Doerder *et al.* 1995). The fixation of a single sex in a location  
540 can potentially provide an advantage to prevent inbreeding because a particular  
541 consequence of probabilistic SD is that it allows for mating among genetically  
542 identical individuals at the micronucleus. The experimental results combined with  
543 the model's predictions suggest that the fixation of a single sex is often caused by  
544 beneficial mutations during sexual reproduction. Interestingly, the process of  
545 choosing which sex to be fixed seems to be random because four different sexes are  
546 fixed in the five replicate experimental populations. Thus, it is likely that in natural  
547 subpopulations, the spontaneous beneficial mutations help their carrying sex to  
548 fixation, which effectively blocks further local inbreeding, and then the  
549 subpopulations can expand rapidly through asexual production. However, due to the  
550 probabilistic SD, mating between subpopulations only containing two different sexes  
551 could lead to the recovery of all the seven sexes, which facilitates the population to  
552 regain the benefits provided by sex when the environment changes dramatically.  
553 Thus, the particular probabilistic SD may provide an advantageous mechanism for  
554 the lineage survival of *T. thermophila* by allowing this species to integrate the  
555 benefits of both sexual and asexual reproduction. However, why the number of  
556 sexes is fixed at seven in natural populations of *T. thermophila* remains a mystery. In  
557 fact, the *Tetrahymena* species have various number of sexes ranging from three to  
558 nine and display different modes of sexual inheritance (Phadke and Zufall 2009), but  
559 little is known about their SD mechanisms, which needs further sequencing of the  
560 MIC genome to elucidate. When more SD mechanisms and sex ratio data from  
561 experimental evolution and natural populations in different species are available,  
562 comparative analysis may be used to explore if there exists an optimal number of sex



563 for a specific species to adjust sex ratio dynamics in the light of our theoretical  
564 framework.

565 In summary, our theoretical model combined with experimental results  
566 provides a comprehensive framework to analyze the dynamics of sex ratio in *T.*  
567 *thermophila*, and proposes a possible strategy of maintaining multiple sexes in  
568 natural populations of *T. thermophila*. In principle, the newly established theoretical  
569 framework is applicable to other multi-sex organisms to bring additional insight into  
570 the understanding of maintenance of multiple sexes in a natural population.

571

572

### 573 **Acknowledgments**

574 We thank Eduardo Orias (University of California Santa Barbara) and Yong Zhang  
575 (Institute of Zoology, Chinese Academy of Sciences) for helpful discussions during the  
576 study. Additional students in Miao's laboratory provide assistance in the long-term  
577 cell culture: Wentao Yang, Guanxiong Yan, Zongyi Sun, and Chuanqi jiang. This study  
578 was supported by the National Natural Science Foundation of China (grant number  
579 91631303 to W.M. and 91631304 to Y.X.F).

580

581

582

583

584

585

586

587 **Literature Cited**

- 588 Allen S. L., 1967 Genomic exclusion: a rapid means for inducing homozygous diploid  
589 lines in *Tetrahymena Pyriformis*, syngen 1. *Science* **155**: 575-577.
- 590 Ammermann D., 1982 Mating Types in *Stylonychia mytilus* Ehrgb. *Archiv für*  
591 *Protistenkunde* **126**: 373-381.
- 592 Arslanyolu M., Doerder F. P., 2000 Genetic and environmental factors affecting  
593 mating type frequency in natural isolates of *Tetrahymena thermophila*. *J. Euk.*  
594 *Microbiol.* **47**: 412-418.
- 595 Bell G., 1982 *The masterpiece of nature: the evolution and genetics of sexuality*.  
596 University of California Press, Berkeley.
- 597 Burt A., 2000 Perspective: sex, recombination, and the efficacy of selection - was  
598 Weismann right? *Evolution* **54**: 337-351.
- 599 Cassidy-Hanley D. M., 2012 *Tetrahymena* in the laboratory: strain resources,  
600 methods for culture, maintenance, and storage. *Methods Cell. Biol.* **109**: 237-  
601 276.
- 602 Cervantes M. D., Hamilton E. P., Xiong J., Lawson M. J., Yuan D. X. *et al.*, 2013  
603 Selecting one of several mating types through gene segmentjoining and  
604 deletion in *Tetrahymena thermophila*. *PLoS Biol.* **11**: e1001518.
- 605 Cingolani P., Platts A., Wang L. L., Coon M., Nguyen T. *et al.*, 2012 A program for  
606 annotating and predicting the effects of single nucleotide polymorphisms,  
607 SnpEff: SNPs in the genome of *Drosophila melanogaster* strain w1118; iso-2;  
608 iso-3. *Fly* **6**: 80-92.

- 609 Doerder F. P., Gates M. A., Eberhardt F. P., Arslanyolu M., 1995 High frequency of sex  
610 and equal frequencies of mating types in natural populations of the ciliate  
611 *Tetrahymena thermophila*. *Proc. Natl. Acad. Sci. USA* **92**: 8715-8718.
- 612 Fisher R. A., 1930 *The genetical theory of natural selection*. Clarendon Press, Oxford,.
- 613 Hamilton E. P., Orias E., 2000 Genetic crosses: setting up crosses, testing progeny,  
614 and isolating phenotypic assortants. *Methods Cell. Biol.* **62**: 219-228.
- 615 Hamilton E. P., Kapusta A., Huvos P. E., Bidwell S. L., Zafar N. *et al.*, 2016 Structure of  
616 the germline genome of *Tetrahymena thermophila* and relationship to the  
617 massively rearranged somatic genome. *Elife* **5**: e19090.
- 618 Kishimoto T., Iijima L., Tatsumi M., Ono N., Oyake A. *et al.*, 2010 Transition from  
619 positive to neutral in mutation fixation along with continuing rising fitness in  
620 thermal adaptive evolution. *PLoS Genet.* **6**: e1001164.
- 621 Koboldt D. C., Chen K., Wylie T., Larson D. E., McLellan M. D. *et al.*, 2009 VarScan:  
622 variant detection in massively parallel sequencing of individual and pooled  
623 samples. *Bioinformatics* **25**: 2283-2285.
- 624 Koboldt D. C., Zhang Q., Larson D. E., Shen D., McLellan M. D. *et al.*, 2012 VarScan 2:  
625 somatic mutation and copy number alteration discovery in cancer by exome  
626 sequencing. *Genome Res.* **22**: 568-576.
- 627 Lang G. I., Rice D. P., Hickman M. J., Sodergren E., Weinstock G. M. *et al.*, 2013  
628 Pervasive genetic hitchhiking and clonal interference in forty evolving yeast  
629 populations. *Nature* **500**: 571-574.
- 630 Long H. A., Winter D. J., Chang A. Y. C., Sung W., Wu S. H. *et al.*, 2016 Low base-  
631 substitution mutation rate in the germline genome of the ciliate *Tetrahymena*  
632 *thermophila*. *Genome Biol. Evol.* **8**: 3629-3639.

- 633 McDonald M. J., Rice D. P., Desai M. M., 2016 Sex speeds adaptation by altering the  
634 dynamics of molecular evolution. *Nature* **531**: 233-236.
- 635 Muller H. J., 1932 Some genetic aspects of sex. *Am. Nat.* **66**: 118-138.
- 636 Nanney D. L., 1960 Temperature effects on nuclear differentiation in variety 1 of  
637 *Tetrahymena pyriformis*. *Physiol. Zool.* **33**: 146-151.
- 638 Orias E., Baum M. P., 1984 Mating type differentiation in *Tetrahymena thermophila*:  
639 strong influence of delayed refeeding of conjugating pairs. *Dev. Genet.* **4**: 145-  
640 158.
- 641 Orias E., Cervantes M. D., Hamilton E. P., 2011 *Tetrahymena thermophila*, a  
642 unicellular eukaryote with separate germline and somatic genomes. *Res.*  
643 *Microbiol.* **162**: 578-586.
- 644 Orias E., Singh D. P., Meyer E., 2017 Genetics and epigenetics of mating type  
645 determination in *Paramecium* and *Tetrahymena*. *Annu. Rev. Microbiol.* **71**: 133-  
646 156.
- 647 Paixao T., Phadke S. S., Azevedo R. B. R., Zufall R. A., 2011 Sex ratio evolution under  
648 probabilistic sex determination. *Evolution* **65**: 2050-2060.
- 649 Perlman B. S., 1973 Temperature effects on maturity periods in *Tetrahymena*  
650 *Pyriformis* Syngen 1. *J. Protozool.* **20**: 106-107.
- 651 Phadke S. S., Zufall R. A., 2009 Rapid diversification of mating systems in ciliates. *Biol.*  
652 *J. Linn. Soc.* **98**: 187-197.
- 653 Phadke S. S., Paixao T., Pham T., Pham S., Zufall R. A., 2014 Genetic Background  
654 alters dominance relationships between *mat* alleles in the ciliate *Tetrahymena*  
655 *thermophila*. *J. Hered.* **105**: 130-135.

- 656 Speijer D., Lukes J., Elias M., 2015 Sex is a ubiquitous, ancient, and inherent attribute  
657 of eukaryotic life. *Proc. Natl. Acad. Sci. USA* **112**: 8827-8834.
- 658 Stover N. A., Krieger C. J., Binkley G., Dong Q., Fisk D. G. *et al.*, 2006 *Tetrahymena*  
659 Genome Database (TGD): a new genomic resource for *Tetrahymena*  
660 *thermophila* research. *Nucleic. Acids. Res.* **34**: D500-D503.
- 661 Sung W., Tucker A. E., Doak T. G., Choi E., Thomas W. K. *et al.*, 2012 Extraordinary  
662 genome stability in the ciliate *Paramecium tetraurelia*. *Proc. Natl. Acad. Sci. USA*  
663 **109**: 19339-19344.
- 664 Weismann A., 1887 On the signification of the polar globules. *Nature* **36**: 607-609.
- 665 West S. A., 2009 *Sex allocation*. Princeton University Press, Princeton and Oxford.
- 666 Xiong J., Wang G. Y., Cheng J., Tian M., Pan X. M. *et al.*, 2015 Genome of the  
667 facultative scuticociliatosis pathogen *Pseudocohnilembus persalinus* provides  
668 insight into its virulence through horizontal gene transfer. *Sci. Rep.* **5**: 15470.
- 669 Zufall R. A., Dimond K. L., Doerder F. P., 2013 Restricted distribution and limited gene  
670 flow in the model ciliate *Tetrahymena thermophila*. *Mol. Ecol.* **22**: 1081-1091.
- 671
- 672
- 673
- 674
- 675
- 676
- 677
- 678

679 **Figure legends**

680 **Figure 1. Impact of the model parameters on sex ratio patterns when there is no**  
681 **selection.** (A-D) Sex ratio pattern at equilibrium when the population starts with  
682 equal proportions of any two of the six sexes (A) and under three specific  $\beta$  values  
683 (B-D). The gray color represents the situation that all sexes co-exist and the other six  
684 colors represent the fixation of one of the six sexes II-VII, respectively. The color  
685 gradients represent the probability of occurrence for each situation. This color  
686 scheme applies to all panels except panel H. (E,F) Sex ratio patterns at equilibrium  
687 when the population starts with any two of the six sexes (E) or all the six sexes (F)  
688 and the initial sex ratio is random but the sum is 1. (G) A special case of sex ratio  
689 pattern when the population starts with even proportions of six sexes. (H) The  
690 probability of co-existence of the six sexes under different values of  $f_{max}$ , the most  
691 frequent sex in parameter  $f$  and  $\beta$  is set to 0.

692

693 **Figure 2. Impact of selection on sex ratio patterns. Sex ratio pattern at equilibrium**  
694 **when sex II, the most frequent sex.** (A) and sex III, the least frequent sex (B) in  
695 parameter  $f$  obtain a beneficial mutation with different selective coefficients. Color  
696 regime is the same as Figure 1A.

697

698 **Figure 3. Impact of environmental fluctuations on sex ratio patterns. Sex ratio**  
699 **pattern at equilibrium when the established equilibrium sex ratio.** (A) or the  
700 empirically estimated parameter  $f$  (B) fluctuates with varying degrees. Color regime  
701 is the same as Figure 1A.

702

703 **Figure 4. Prediction of sex ratio dynamics.** Predicted sex ratio trajectory when  
704 populations start with equal proportions of the two ancestral populations and mate  
705 every 100 asexual generations, and there is no selection.

706

707 **Figure 5. Increased fitness of sexual progeny were responsible for the fixation of a**  
708 **certain sex in each of the replicate populations.** (A) Sex ratio dynamics in the  
709 populations CS1 to CS3. Each colored bar represents the frequency of a sex, as  
710 determined by sequencing data. (B) Relative fitness trajectories during experimental  
711 evolution. The fitted growth model for each replicate population was plotted with a  
712 different colored line. (C) Temporal changes in the frequency of novel SNPs  
713 recombined into progeny MAC TM exons. Panels show SNP frequency changes in the  
714 CS1, CS2, and CS4 populations. Numbers indicate SNP positions at the MIC *mat* locus  
715 and frequency changes refer to non-reference bases, e.g. in the CS1 panel, for A > C,  
716 A is the reference base and C is the non-reference base. Generation 0 represents  
717 SNP frequency in the two ancestral cells. Each SNP is represented by the same color  
718 in all three panels.

719

720 **Figure 6. The fixation of a single sex in the population is caused by newly arisen**  
721 **beneficial mutations.** (A) Interactions between beneficial mutations and sex fixation  
722 in the CS1 population. Red line, a verified beneficial mutation; gray lines, other  
723 detected mutations. The green shows the process of sex IV purification within the  
724 population. The black line shows the growth fitness trajectory. The purple line  
725 represents the change in frequency of the fixed novel SNP at the MAC *mat* locus  
726 (shown in Figure 5C; purple line in CS1). (B) Functional validation of putative

727 beneficial mutations. Each of ancestral cell populations was co-cultured with its  
728 corresponding mutant cell population containing the candidate beneficial mutation  
729 (panel A; red line) with daily serial passage. DNA samples were taken every 2 days  
730 and analyzed by Sanger sequencing to determine the relative ratio of the two cell  
731 types. Competition assays were performed in duplicate. (C) Comparison of sex  
732 fixation trajectories between experimental observations and the model's predictions.  
733 Model predictions assume the fixed sex in each population acquired a beneficial  
734 mutation in the MAC after one of the first five rounds of mating. Black dots are  
735 observed frequencies. The best fits are shown as red lines.



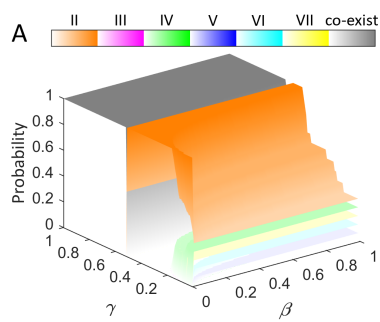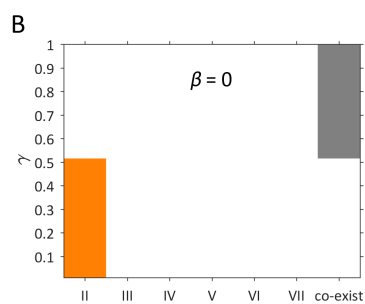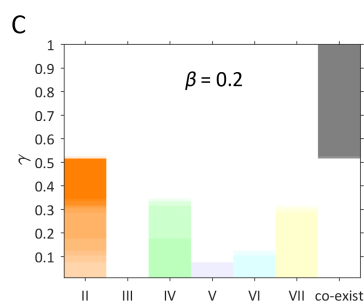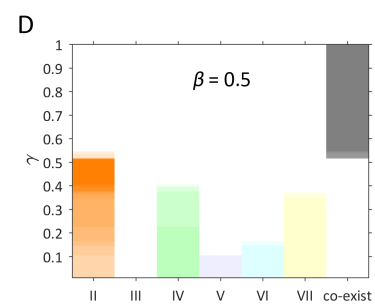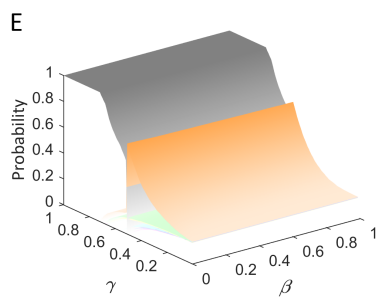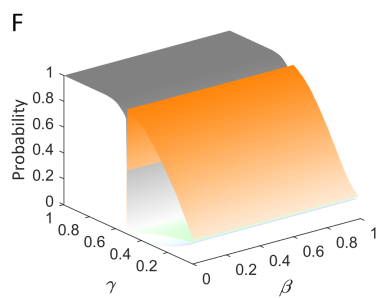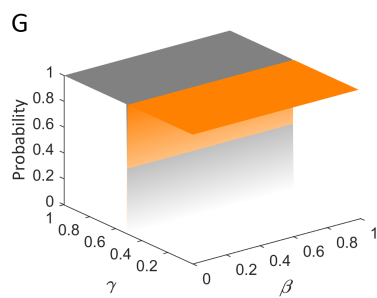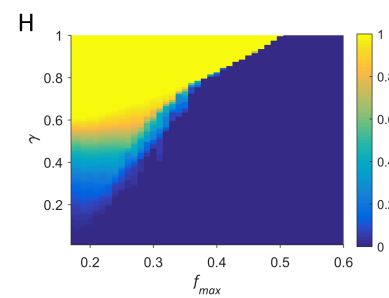

**A**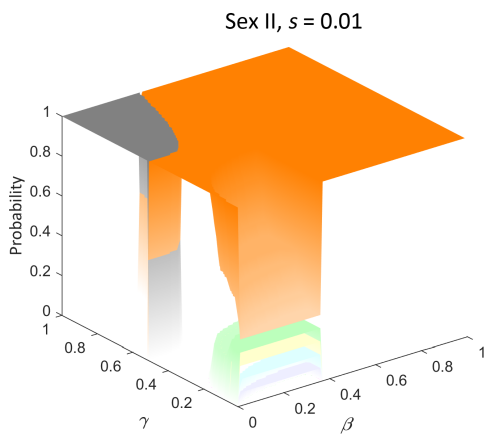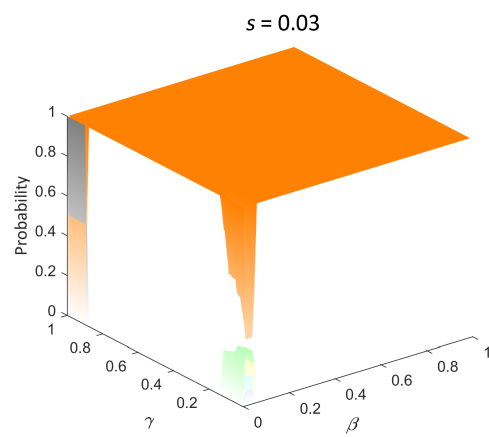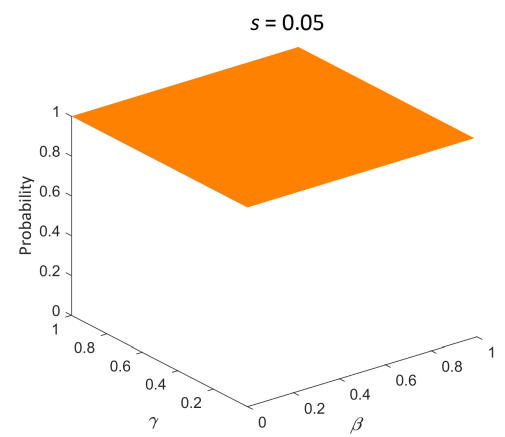**B**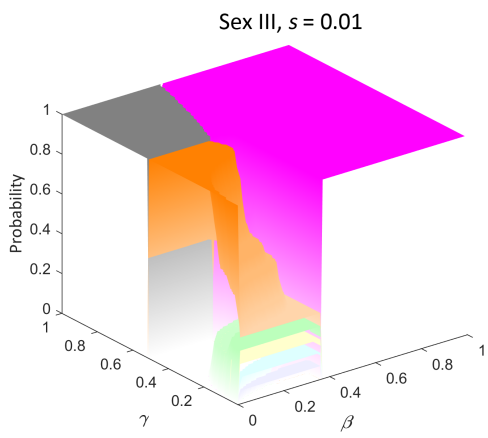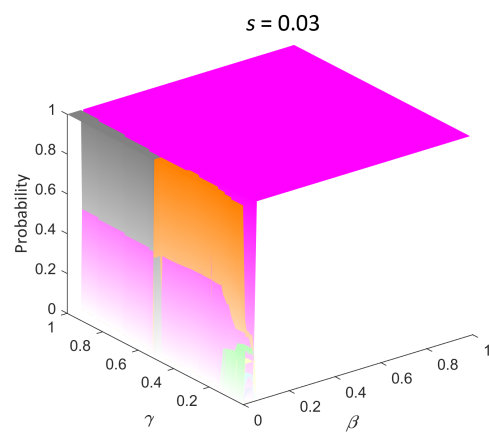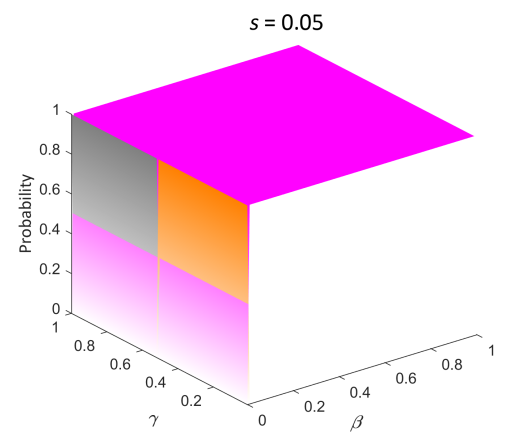

**A**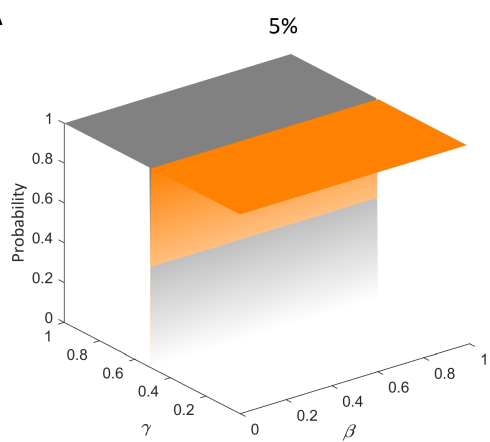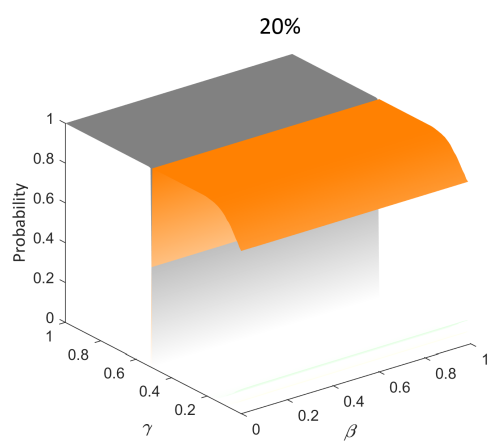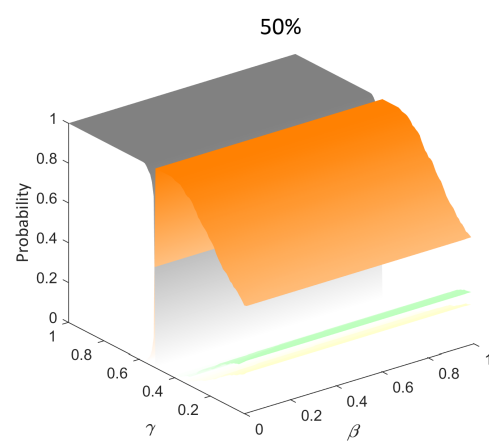**B**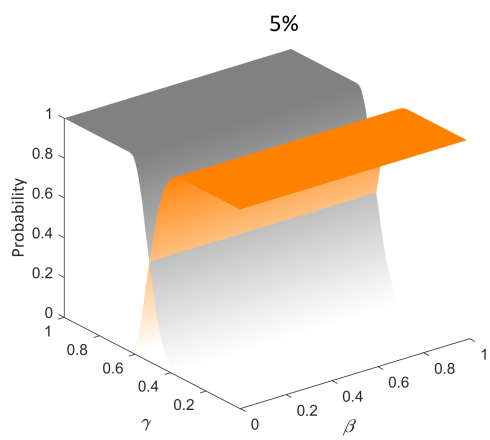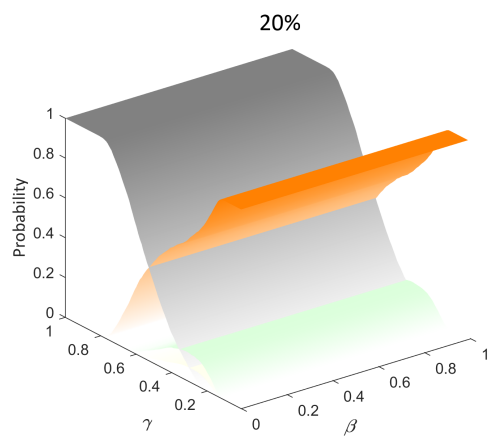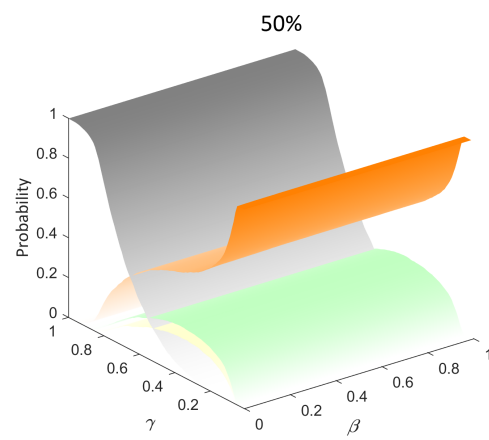

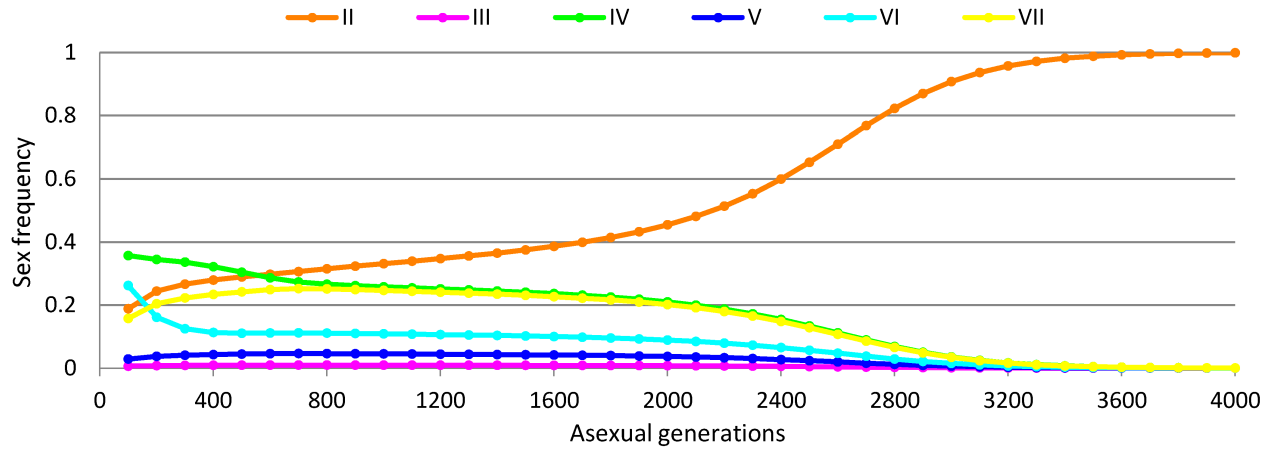

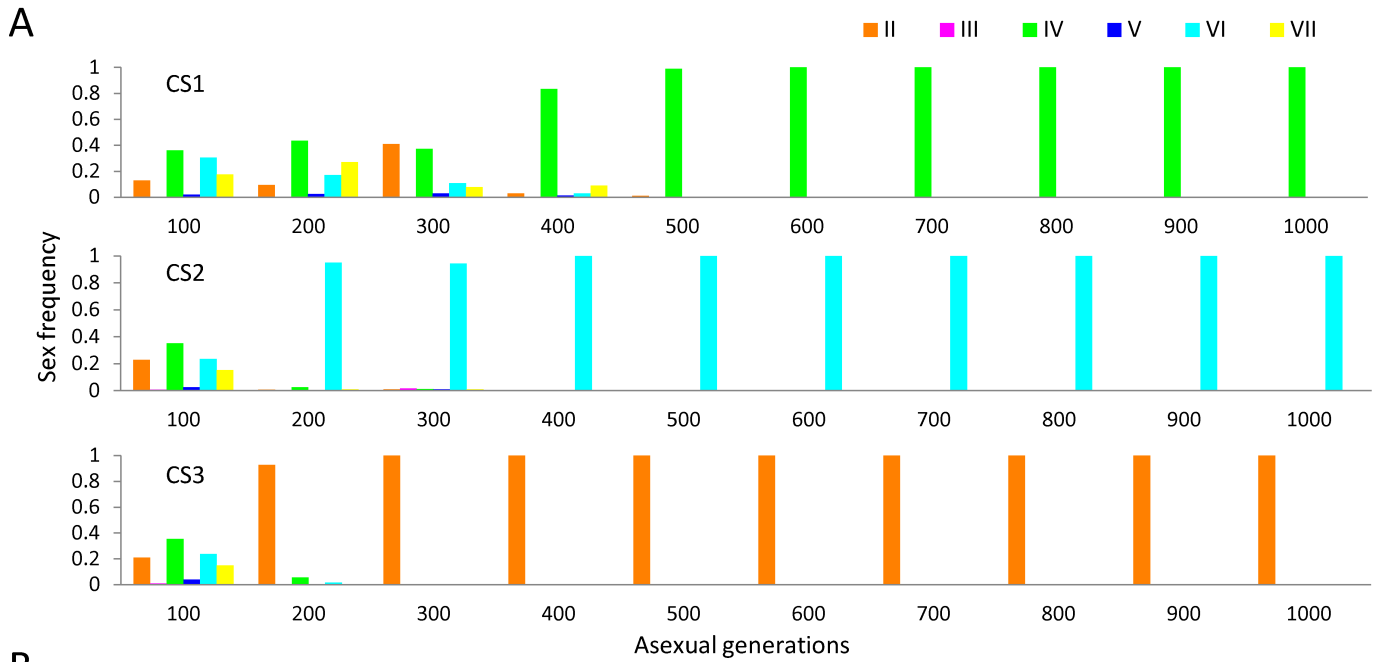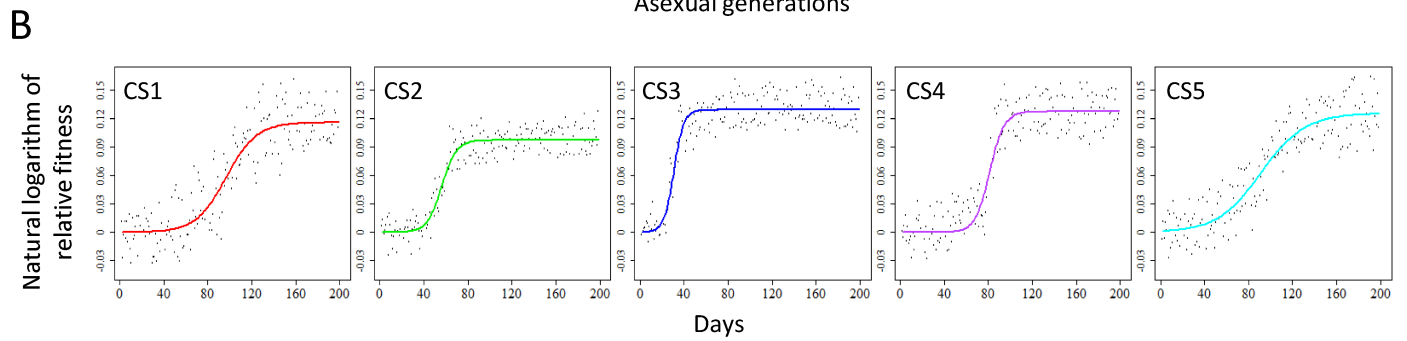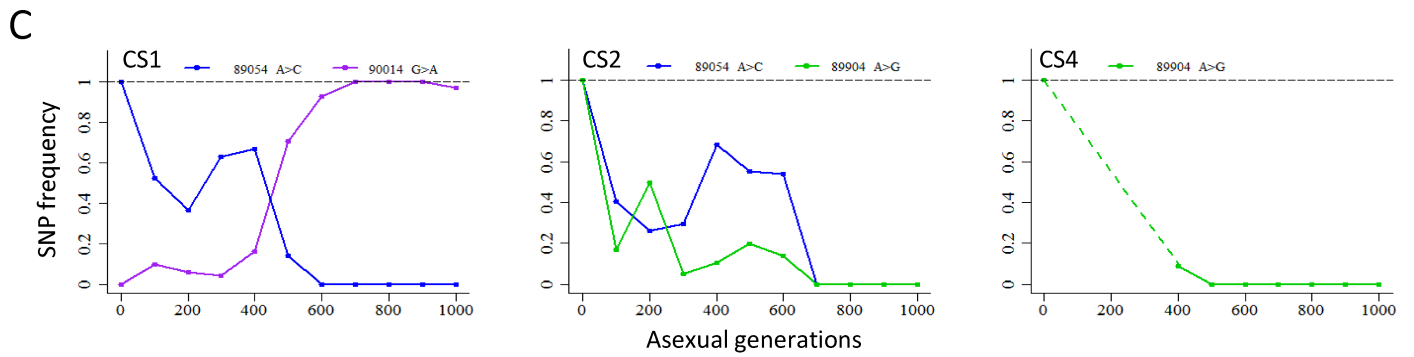

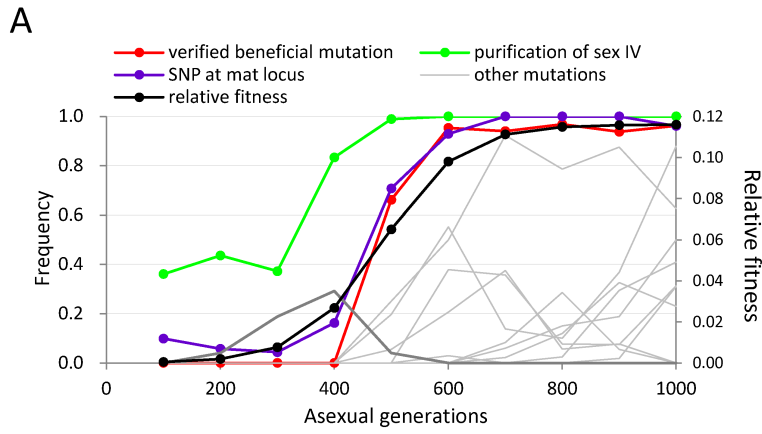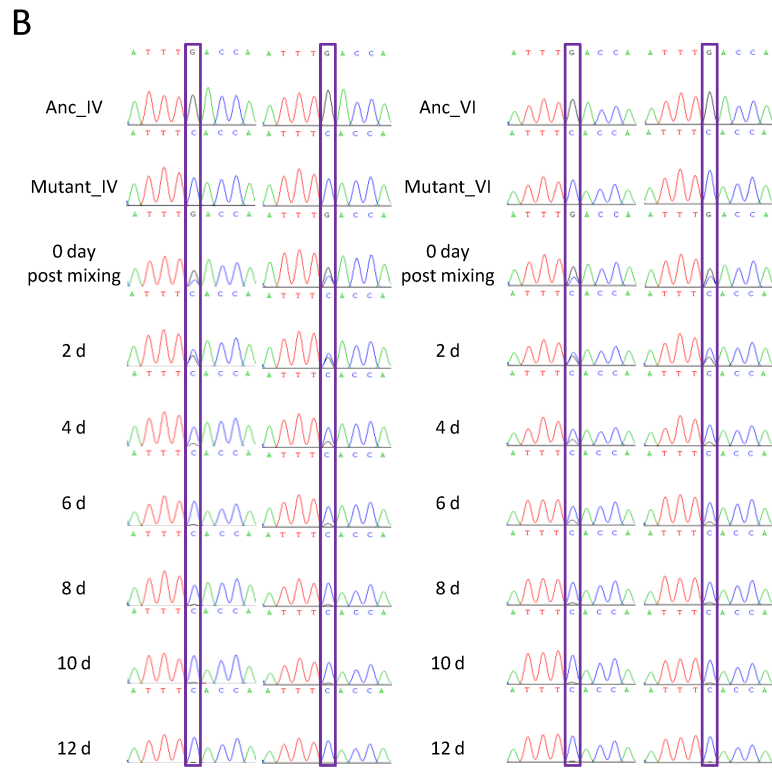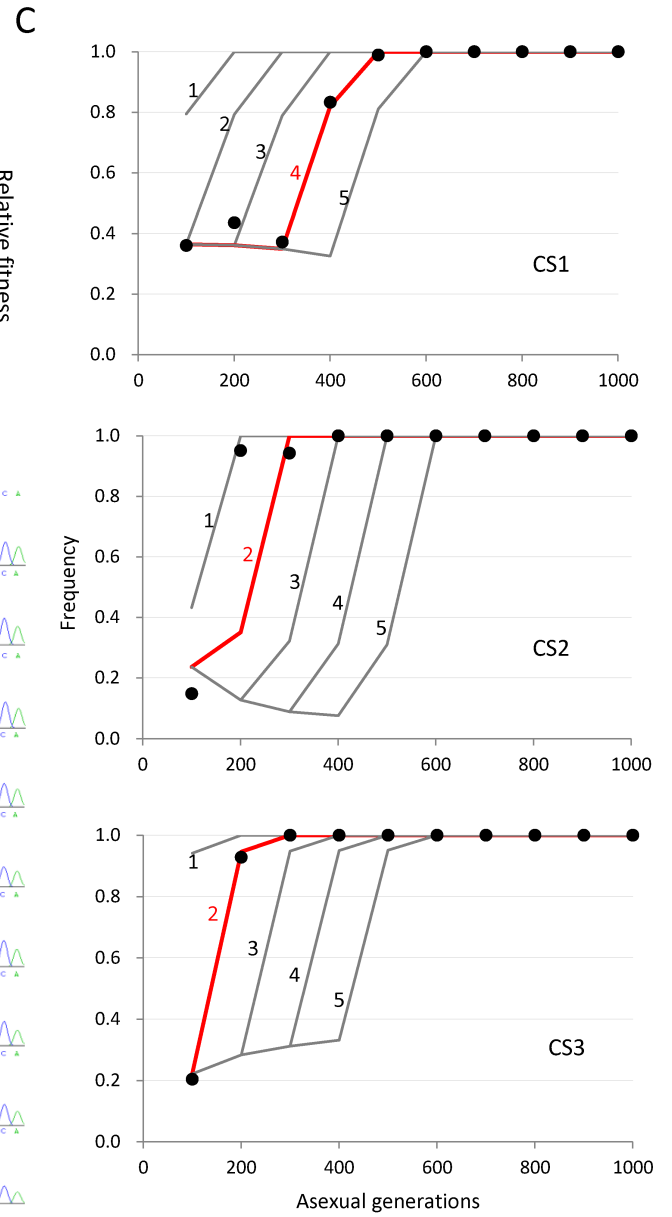

Source: https://www.biorxiv.org/content/10.1101/327544v1.full.pdf
